# Supplementary material for: Mechanistic insights into supersaturation mediated large area growth of hexagonal boron nitride for graphene electronics
Source: Royal Society of Chemistry journal article supplement (doi:10.1039/d2tc01004f), 2022-01-01
Supplement: d2tc01004f1.pdf [file d2tc01004f1.pdf]

## Supporting Information Section

### **Mechanistic Insights into Supersaturation mediated Large Area Growth of hexagonal Boron Nitride for Graphene Electronics**

Ankit Rao, Srinivasan Raghavan\*

Centre for Nano Science and Engineering, Indian Institute of Science, Bengaluru 560012

\*E-mail: [sraghavan@iisc.ac.in](mailto:sraghavan@iisc.ac.in)

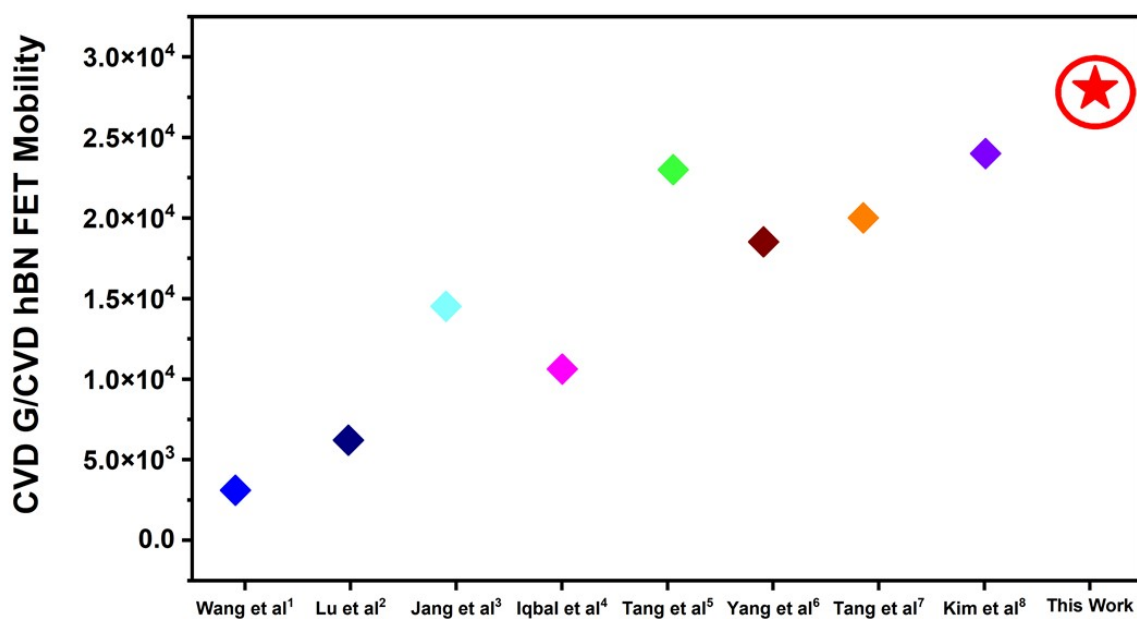

**Figure S1.** Comparison of FET Mobility values of CVD Graphene on CVD hBN<sup>1-8</sup>

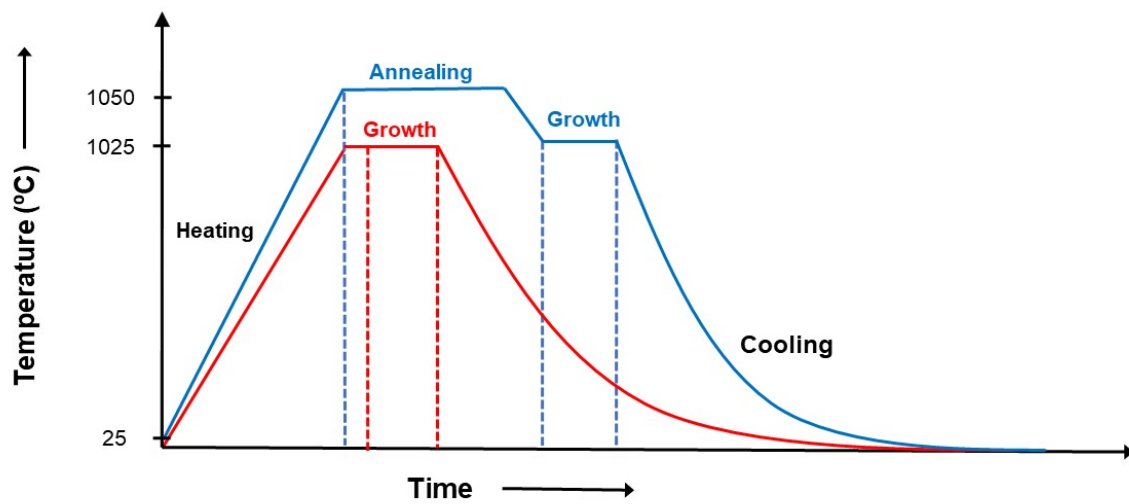

**Figure S2.** Schematic of the temperature profile for the growth setup for controlled h-BN growth.

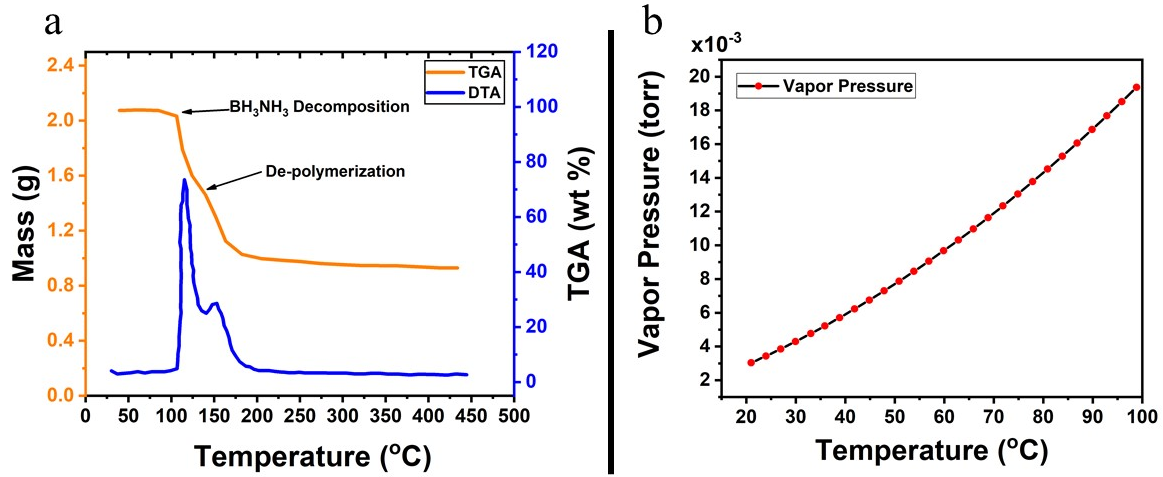

**Figure S3.** a) TGA/DTA curve of BH<sub>3</sub>NH<sub>3</sub> for a temperature range from 25C to 450C. b) Vapor pressure plot of BH<sub>3</sub>NH<sub>3</sub> in torr.

The precursor flux is a function of vapor pressure of the precursor ( $P_{\text{BH}_3\text{NH}_3}$ ), the flow rate of the carrier gas ( $\eta_{\text{carrier}}$ ) and the pressure maintained inside the vaporizer setup ( $p_{\text{vaporizer}}$ ) as given in eqn (S4).

$$p_{\text{BH}_3\text{NH}_3} = \left[ \left( \frac{dm}{dt} \right) \sqrt{\frac{T}{M}} \right] \quad (\text{S1})$$

$$\eta_{\text{BH}_3\text{NH}_3} = \frac{p_{\text{BH}_3\text{NH}_3} * \eta_{\text{carrier}}}{p_{\text{vaporizer}}} \quad (\text{S2})$$

where  $dm/dt$  is the rate of mass loss obtained from TGA/DTA plot,  $T$  is the temperature in kelvins,  $M$  is the molecular weight of the precursor and  $R$  is the gas constant.

## S1. Nanocrystalline Boron Nitride

The amount of n-BN by-product and the reactivity on the surface increases with increase in partial pressure as shown in Fig S4a. The decrease in carrier flow rate results in lesser amount of hydrogen reacting with the precursor reactor and hence results in reduction of n-BN density. This allows us to obtain clean h-BN which is an essential factor for its application as a substrate.

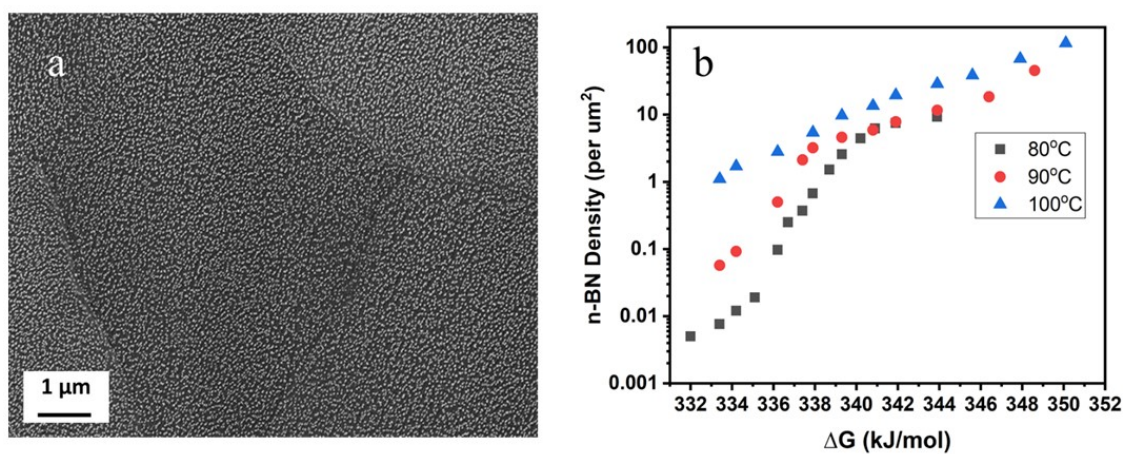

**Figure S4.** a) n-BN particles covering the Cu surface. b) Experimental n-BN density as a function of supersaturation.

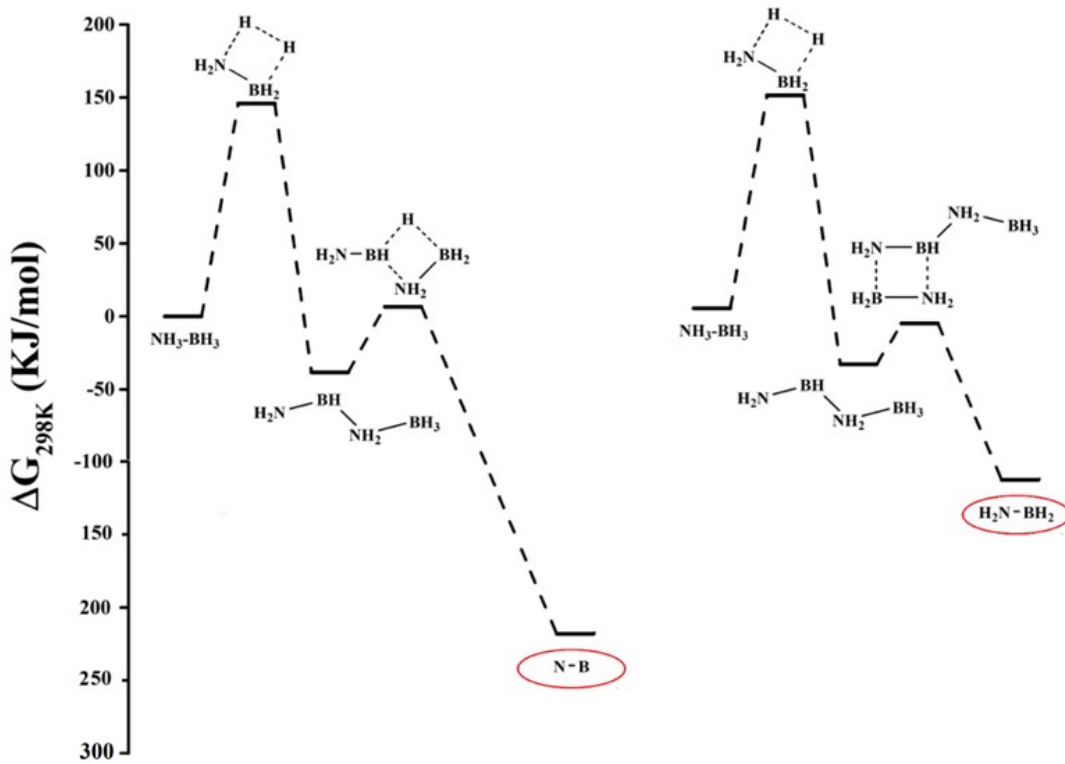

**Figure S5.** Potential Energy Surface diagram for the formation of h-BN and  $\text{BNH}_4$  from  $\text{BH}_3\text{-NH}_3$ .

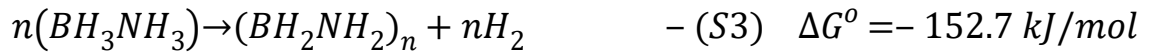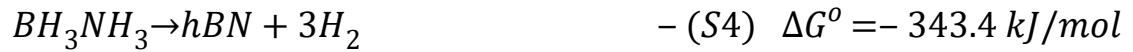

Eqn (S5) is derived from the supersaturation equation to calculate the equilibrium partial pressure of the precursor as a function of temperature and total reactor pressure. This value indicates the minimum partial pressure of the precursor required for the formation of hBN on the surface of Cu.

$$p_{\text{BH}_3\text{NH}_3}^{eq} = \frac{P_{total}}{1 + \frac{e^{\left(\frac{-\Delta G^0}{RT}\right)}}{P_{total}^2}} \quad (S5)$$

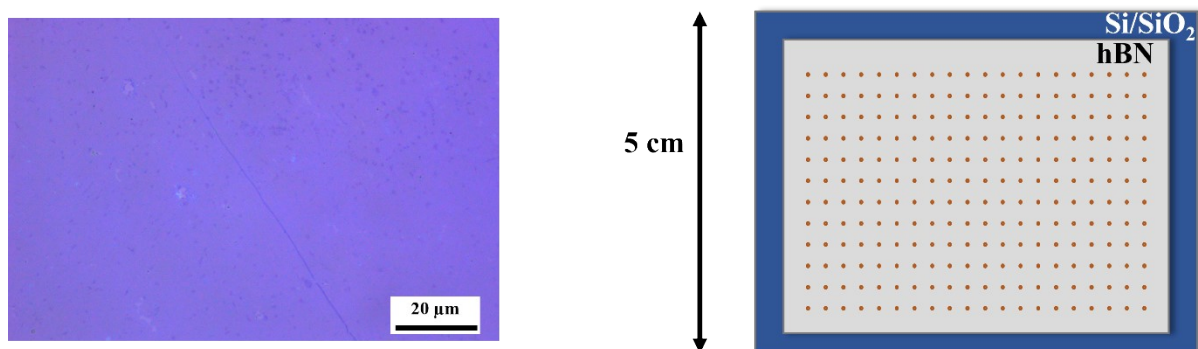

**Figure S6.** (a) Optical image of the transferred multilayer (5 layer) thick hBN. b) Raman mapping measurements on 25 cm<sup>2</sup> area hBN transferred onto Si/SiO<sub>2</sub>.

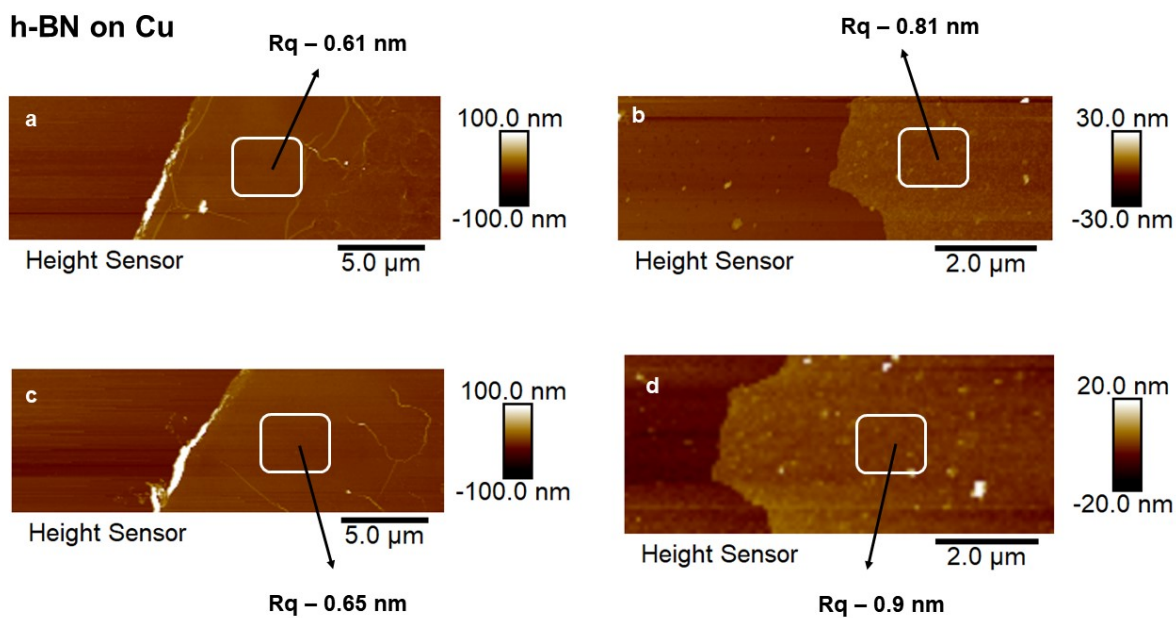

**Figure S7.** AFM scans with roughness  $R_q$  of films grown on Cu. a) On 28 nm film grown on Cu, b) 5 nm film grown on Cu, c) 28 nm film transferred on Si/SiO<sub>2</sub>, d) 5 nm film transferred on Si/SiO<sub>2</sub>

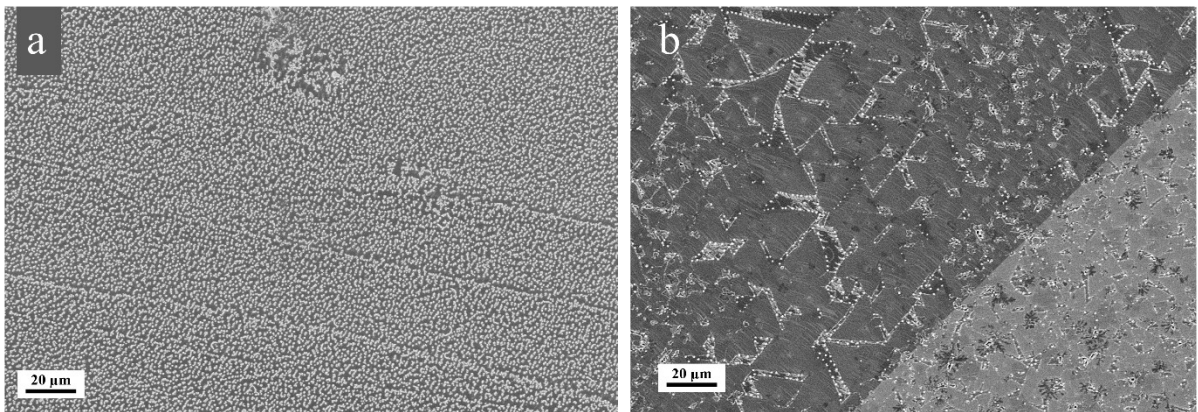

**Figure S8.** SEM image of h-BN grown on (a) unannealed Cu substrate and (b) annealed Cu substrate at exact conditions exhibiting the effect on substrate morphology on growth.

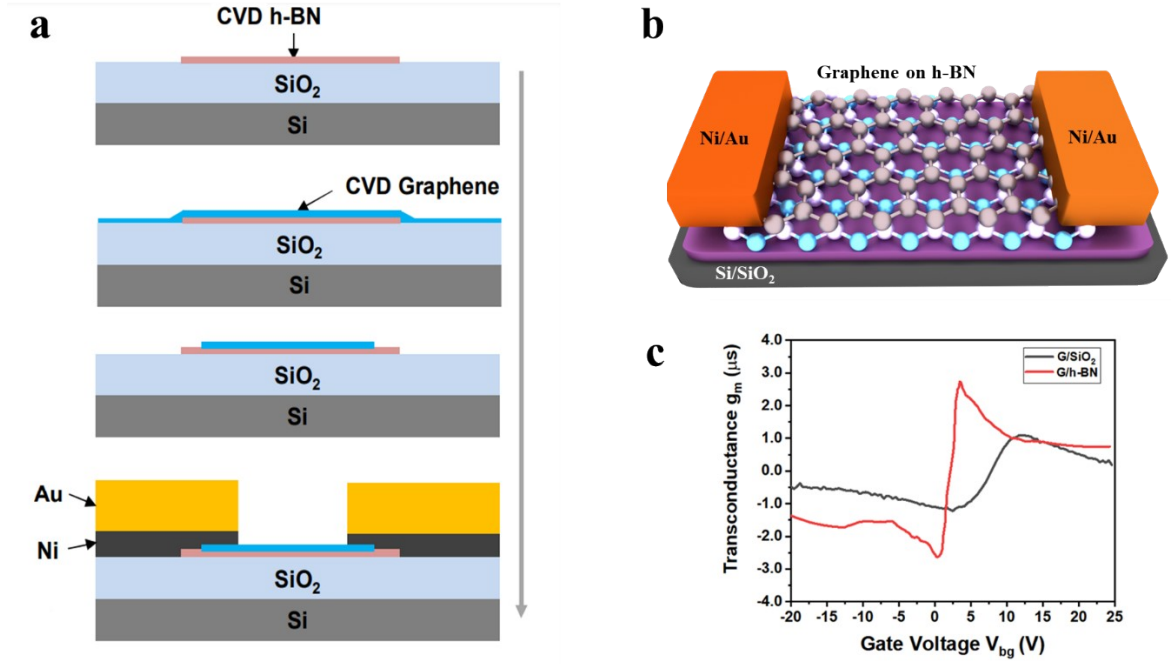

**Figure S9.** a) Process flow for fabrication of G/h-BN devices, b) Schematic of the fabricated device. c) Transconductance ( $g_m$ ) vs Gate Voltage ( $V_g$ ) of the fabricated device.

## S2. Mobility Extraction

In the transconductance method or the Drude model, gate voltage dependent transconductance is used to calculate the field effect mobility, i.e.

$$\mu_{FET} = g_m \frac{L}{WV_{ds}C_{ox}} \quad (S5)$$

where  $g_m = \frac{\partial I_d}{\partial V_g}$  is transconductance and the mobility  $\mu_{FET}$  is the field-effect mobility. Due to the ignorance of contact resistance, field-effect mobility is always lower than the real mobility at any given gate voltage, and the gap between field-effect mobility and actual value depends on gate voltage, channel length and conduction type.

While the choice of the model to extract mobility varies widely in the literature, Ruoff et. al.<sup>10</sup> showed that the constant mobility fit is the most physically apt one. The constant mobility fit model fits the observed channel resistance variation with the gate voltage very nicely over entire range. Hence, in this work, the constant mobility fit is the method used to extract the mobility along with the transconductance method.



| Furnace Temperature (°C) | Reactor Pressure (torr) | Reactor Pressure (atm) | BH3-NH3 Flow Rate (Calculated) | Ar Flow Rate (sccm) | H2 Flow Rate (sccm) | H2 Flow Rate (bubbler) | Eqm Partial Pressure (BH3NH3) | Partial Pressure (BH3NH3) | ΔG (kJ/mol) |
|--------------------------|-------------------------|------------------------|--------------------------------|---------------------|---------------------|------------------------|-------------------------------|---------------------------|-------------|
| 950                      | 3                       | 0.0039                 | 0.0085                         | 500                 | 10                  | 1                      | 1.074E-10                     | 6.36E-07                  | 297.718     |
| 950                      | 1.9                     | 0.0025                 | 0.0107                         | 200                 | 30                  | 10                     | 1.203E-10                     | 1.07E-06                  | 317.023     |
| 975                      | 0.5                     | 0.0007                 | 0.0012                         | 50                  | 20                  | 10                     | 1.017E-09                     | 1.10E-07                  | 311.203     |
| 975                      | 2.2                     | 0.0029                 | 0.0128                         | 400                 | 20                  | 1                      | 1.756E-10                     | 8.42E-07                  | 298.094     |
| 1000                     | 0.5                     | 0.0007                 | 0.0026                         | 50                  | 20                  | 1                      | 8.586E-11                     | 2.31E-07                  | 303.876     |
| 1000                     | 3                       | 0.0039                 | 0.0128                         | 500                 | 20                  | 10                     | 2.41E-10                      | 9.36E-06                  | 298.570     |
| 1000                     | 0.5                     | 0.0007                 | 0.0070                         | 50                  | 20                  | 1                      | 7.017E-10                     | 6.14E-07                  | 295.305     |
| 1020                     | 0.5                     | 0.0007                 | 0.0064                         | 50                  | 20                  | 10                     | 1.017E-09                     | 5.61E-07                  | 294.827     |
| 1020                     | 2.2                     | 0.0029                 | 0.0107                         | 300                 | 20                  | 1                      | 3.811E-10                     | 9.08E-07                  | 302.440     |
| 1025                     | 0.5                     | 0.0007                 | 0.0014                         | 50                  | 20                  | 1                      | 9.108E-09                     | 1.80E-07                  | 306.410     |
| 1025                     | 1.2                     | 0.0016                 | 0.0040                         | 150                 | 10                  | 1                      | 1.449E-10                     | 3.68E-07                  | 292.231     |
| 1025                     | 3.8                     | 0.0050                 | 0.0085                         | 750                 | 30                  | 10                     | 2.945E-10                     | 5.33E-07                  | 305.079     |
| 1025                     | 10                      | 0.0007                 | 0.0140                         | 50                  | 20                  | 10                     | 6.449E-09                     | 1.15E-06                  | 290.532     |
| 1025                     | 1.2                     | 0.0016                 | 0.0049                         | 100                 | 30                  | 1                      | 1.407E-08                     | 5.13E-07                  | 322.372     |
| 1025                     | 1.5                     | 0.0020                 | 0.0049                         | 50                  | 10                  | 10                     | 1.73E-09                      | 1.37E-06                  | 313.973     |
| 1025                     | 0.9                     | 0.0012                 | 0.0020                         | 50                  | 50                  | 10                     | 2.051E-10                     | 2.41E-07                  | 336.026     |
| 1025                     | 5                       | 0.0066                 | 0.0085                         | 500                 | 30                  | 10                     | 2.064E-09                     | 1.02E-06                  | 319.089     |
| 1025                     | 5                       | 0.0066                 | 0.0078                         | 100                 | 30                  | 1                      | 4.018E-07                     | 9.42E-06                  | 348.102     |
| 1030                     | 0.5                     | 0.0007                 | 0.0009                         | 50                  | 20                  | 10                     | 7.109E-10                     | 7.91E-07                  | 311.462     |
| 1030                     | 0.5                     | 0.0007                 | 0.0010                         | 40                  | 30                  | 1                      | 2.262E-09                     | 9.52E-07                  | 321.995     |
| 1030                     | 1                       | 0.0013                 | 0.0008                         | 50                  | 20                  | 10                     | 5.46E-11                      | 1.83E-07                  | 327.119     |
| 1030                     | 10                      | 0.0013                 | 0.0008                         | 50                  | 20                  | 1                      | 5.46E-09                      | 1.43E-07                  | 327.119     |
| 1030                     | 1                       | 0.0013                 | 0.0005                         | 50                  | 40                  | 10                     | 1.978E-10                     | 7.44E-07                  | 348.157     |
| 1040                     | 0.5                     | 0.0007                 | 0.0009                         | 50                  | 20                  | 1                      | 7.111E-10                     | 7.91E-07                  | 310.882     |
| 1040                     | 1                       | 0.0013                 | 0.0008                         | 100                 | 20                  | 1                      | 1.096E-09                     | 8.38E-07                  | 314.969     |
| 1040                     | 0.5                     | 0.0007                 | 0.0010                         | 40                  | 30                  | 10                     | 2.263E-10                     | 9.52E-07                  | 321.496     |
| 1040                     | 1                       | 0.0013                 | 0.0008                         | 50                  | 20                  | 10                     | 5.462E-09                     | 1.53E-07                  | 326.659     |
| 1040                     | 1                       | 0.0013                 | 0.0005                         | 50                  | 40                  | 1                      | 1.979E-10                     | 7.44E-07                  | 347.859     |

|      |     |        |        |     |    |    |           |          |         |
|------|-----|--------|--------|-----|----|----|-----------|----------|---------|
| 1050 | 0.5 | 0.0007 | 0.0009 | 100 | 20 | 10 | 7.144E-09 | 4.64E-07 | 298.574 |
| 1050 | 0.5 | 0.0007 | 0.0010 | 40  | 30 | 1  | 2.263E-10 | 9.52E-07 | 320.997 |
| 1050 | 1   | 0.0013 | 0.0005 | 100 | 40 | 10 | 5.295E-10 | 4.79E-07 | 337.893 |
| 1050 | 1   | 0.0013 | 0.0008 | 50  | 20 | 1  | 5.463E-09 | 1.43E-07 | 326.199 |
| 1050 | 1   | 0.0013 | 0.0008 | 50  | 40 | 10 | 1.979E-09 | 1.12E-07 | 343.100 |

**Table S1.** A summary of the growth conditions at various growth conditions to study the effect of supersaturation

| Run No. | Furnace Temperature (°C) | Reactor Pressure (torr) | BH3-NH3 Flow Rate (Calculated) | Ar Flow Rate (sccm) | H2 Flow Rate (sccm) | Vapor Pressures (BH3NH3) | Supersaturation (kJ/mol) |
|---------|--------------------------|-------------------------|--------------------------------|---------------------|---------------------|--------------------------|--------------------------|
| 1       | 1025                     | 10                      | 0.0085                         | 100                 | 30                  | 0.00528                  | 362.092                  |
| 2       | 1025                     | 1                       | 0.0005                         | 50                  | 40                  | 0.0128                   | 348.157                  |
| 3       | 1025                     | 1                       | 0.0005                         | 50                  | 40                  | 0.0128                   | 348.157                  |
| 4       | 1025                     | 1                       | 0.0026                         | 50                  | 50                  | 0.0128                   | 335.779                  |
| 5       | 1025                     | 2                       | 0.0107                         | 200                 | 80                  | 0.0128                   | 332.428                  |
| 6       | 1025                     | 5                       | 0.0085                         | 300                 | 30                  | 0.0128                   | 328.845                  |
| 7       | 1025                     | 1                       | 0.0008                         | 50                  | 20                  | 0.0128                   | 327.119                  |
| 8       | 1025                     | 0.5                     | 0.0010                         | 40                  | 30                  | 0.0128                   | 321.995                  |
| 9       | 1025                     | 5                       | 0.0085                         | 500                 | 30                  | 0.0128                   | 319.089                  |
| 10      | 1025                     | 5                       | 0.0085                         | 700                 | 30                  | 0.0128                   | 312.395                  |
| 11      | 1025                     | 0.5                     | 0.0016                         | 50                  | 20                  | 0.0128                   | 314.579                  |
| 12      | 1025                     | 0.5                     | 0.0009                         | 50                  | 20                  | 0.0128                   | 311.462                  |
| 13      | 1025                     | 3                       | 0.0085                         | 500                 | 30                  | 0.0128                   | 308.064                  |
| 14      | 1025                     | 3                       | 0.0085                         | 500                 | 30                  | 0.0128                   | 308.064                  |
| 15      | 1025                     | 5                       | 0.0085                         | 900                 | 30                  | 0.0128                   | 307.293                  |
| 16      | 1025                     | 5                       | 0.0085                         | 900                 | 30                  | 0.0128                   | 307.293                  |
| 17      | 1025                     | 3                       | 0.0160                         | 500                 | 30                  | 0.0128                   | 306.794                  |
| 18      | 1025                     | 3                       | 0.0071                         | 600                 | 30                  | 0.0128                   | 306.426                  |
| 19      | 1025                     | 0.5                     | 0.0026                         | 50                  | 20                  | 0.0128                   | 301.915                  |
| 20      | 1025                     | 3                       | 0.0128                         | 500                 | 20                  | 0.0128                   | 296.860                  |
| 21      | 1025                     | 3                       | 0.0085                         | 500                 | 10                  | 0.0128                   | 292.326                  |
| 22      | 1025                     | 0.5                     | 0.0064                         | 50                  | 20                  | 0.0128                   | 294.113                  |
| 23      | 1025                     | 0.5                     | 0.0064                         | 50                  | 20                  | 0.0128                   | 294.113                  |

**Table S2.** A summary of the growth conditions at 1025°C

| No. | Furnace Temperature | Reactor Pressure (torr) | BH3-NH3 Flow Rate (Calculated) | Ar Flow Rate | H2 Flow Rate | H2 Flow Rate (bubbler) | Time (min) | Partial Pressure (BH3NH3) | Partial Pressure (H2) | Supersaturation |
|-----|---------------------|-------------------------|--------------------------------|--------------|--------------|------------------------|------------|---------------------------|-----------------------|-----------------|
| 1   | 1025                | 3                       | 8.53E-03                       | 500          | 30           | 20                     | 10         | 6.12E-08                  | 1.64E-01              | 308.06          |
| 2   | 1025                | 3                       | 8.53E-03                       | 500          | 30           | 20                     | 15         | 6.12E-08                  | 1.64E-01              | 308.06          |
| 3   | 1025                | 3                       | 8.53E-03                       | 500          | 10           | 20                     | 10         | 6.36E-08                  | 5.66E-02              | 292.33          |
| 4   | 1025                | 4.3                     | 8.53E-03                       | 500          | 30           | 20                     | 15         | 8.78E-08                  | 2.35E-01              | 315.83          |
| 5   | 1025                | 5                       | 8.53E-03                       | 500          | 30           | 20                     | 15         | 1.02E-07                  | 2.73E-01              | 319.09          |
| 6   | 1025                | 3                       | 1.28E-02                       | 500          | 20           | 20                     | 30         | 9.36E-08                  | 1.11E-01              | 296.86          |
| 7   | 1025                | 3                       | 1.60E-02                       | 500          | 30           | 30                     | 30         | 1.13E-07                  | 1.61E-01              | 306.79          |
| 8   | 1025                | 5                       | 8.53E-03                       | 300          | 30           | 20                     | 15         | 1.60E-07                  | 4.29E-01              | 328.84          |
| 9   | 1025                | 2.2                     | 1.07E-02                       | 300          | 20           | 20                     | 25         | 9.08E-08                  | 1.29E-01              | 302.12          |
| 10  | 1025                | 10                      | 2.48E-02                       | 250          | 50           | 20                     | 5          | 1.02E-06                  | 1.56E+00              | 345.12          |
| 11  | 1025                | 1.9                     | 8.53E-03                       | 250          | 30           | 20                     | 25         | 7.11E-08                  | 1.90E-01              | 311.29          |
| 12  | 1025                | 2                       | 1.07E-02                       | 200          | 80           | 20                     | 15         | 9.36E-08                  | 5.33E-01              | 332.43          |
| 13  | 1025                | 2.2                     | 8.53E-03                       | 200          | 100          | 20                     | 40         | 7.72E-08                  | 6.88E-01              | 341.4           |
| 14  | 1025                | 1.9                     | 1.07E-02                       | 200          | 30           | 20                     | 40         | 1.07E-07                  | 2.28E-01              | 312.82          |
| 15  | 1025                | 10                      | 1.17E-02                       | 150          | 30           | 20                     | 10         | 7.70E-07                  | 1.50E+00              | 352.48          |
| 16  | 1025                | 3.5                     | 4.56E-03                       | 150          | 30           | 20                     | 7          | 1.05E-07                  | 5.25E-01              | 339.99          |
| 17  | 1025                | 1.2                     | 3.97E-03                       | 150          | 10           | 10                     | 10         | 3.68E-08                  | 7.06E-02              | 292.23          |
| 18  | 1030                | 1.5                     | 4.00E-02                       | 150          | 30           | 20                     | 20         | 3.95E-07                  | 2.25E-01              | 299.34          |
| 19  | 1030                | 1.2                     | 4.00E-02                       | 150          | 30           | 20                     | 30         | 3.16E-07                  | 1.80E-01              | 294.5           |
| 20  | 1025                | 1.2                     | 4.88E-03                       | 100          | 30           | 20                     | 10         | 5.13E-08                  | 2.40E-01              | 322.37          |
| 21  | 1025                | 5                       | 7.80E-03                       | 100          | 30           | 20                     | 7          | 3.42E-07                  | 1.00E+00              | 348.1           |
| 22  | 1025                | 10                      | 8.53E-03                       | 100          | 30           | 20                     | 15         | 7.49E-07                  | 2.00E+00              | 362.09          |
| 23  | 1030                | 1.2                     | 1.71E-03                       | 100          | 50           | 1                      | 30         | 1.78E-08                  | 3.97E-01              | 335.41          |
| 24  | 1000                | 5                       | 7.93E-03                       | 50           | 50           | 20                     | 5          | 4.35E-07                  | 2.08E+00              | 358.89          |
| 25  | 1025                | 1.5                     | 4.88E-03                       | 50           | 10           | 10                     | 5          | 1.37E-07                  | 2.14E-01              | 313.97          |
| 26  | 1030                | 0.5                     | 6.40E-03                       | 50           | 20           | 5                      | 30         | 5.61E-08                  | 1.33E-01              | 294.11          |
| 27  | 1030                | 0.5                     | 2.56E-03                       | 50           | 20           | 3                      | 30         | 2.31E-08                  | 1.37E-01              | 301.92          |
| 28  | 1030                | 0.5                     | 6.40E-04                       | 50           | 20           | 1                      | 30         | 5.93E-09                  | 1.41E-01              | 314.58          |
| 29  | 1030                | 1                       | 7.68E-04                       | 50           | 20           | 0.6                    | 30         | 1.43E-08                  | 2.83E-01              | 327.12          |
| 30  | 1030                | 1                       | 5.12E-04                       | 50           | 40           | 0.6                    | 25         | 7.44E-09                  | 4.42E-01              | 348.16          |
| 31  | 1030                | 1                       | 2.56E-03                       | 50           | 50           | 1                      | 30         | 3.34E-08                  | 4.95E-01              | 335.78          |
| 32  | 1030                | 0.9                     | 2.05E-03                       | 50           | 50           | 0.8                    | 20         | 2.41E-08                  | 4.46E-01              | 335.83          |
|     |                     |                         |                                |              |              |                        |            |                           |                       |                 |

**Table S3.** Set of growth runs indicating the effects of H<sub>2</sub> partial pressure with other parameters being constant.

## References

1. Wang, M. *et al.* A platform for large-scale graphene electronics - CVD growth of single-layer graphene on CVD-grown hexagonal boron nitride. *Adv. Mater.* **25**, 2746–2752 (2013).
2. Lu, G. *et al.* Synthesis of large single-crystal hexagonal boron nitride grains on Cu-Ni alloy. *Nat. Commun.* **6**, 1–7 (2015).
3. Jang, A. R. *et al.* Wafer-Scale and Wrinkle-Free Epitaxial Growth of Single-Orientated Multilayer Hexagonal Boron Nitride on Sapphire. *Nano Lett.* **16**, 3360–3366 (2016).
4. Iqbal, M. W., Iqbal, M. Z., Jin, X., Eom, J. & Hwang, C. Superior characteristics of graphene field effect transistor enclosed by chemical-vapor-deposition-grown hexagonal boron nitride. *J. Mater. Chem. C* **2**, 7776–7784 (2014).
5. Tang, S. *et al.* Silane-catalysed fast growth of large single-crystalline graphene on hexagonal boron nitride. *Nat. Commun.* **6**, 6499 (2015).
6. Yang, W. *et al.* Epitaxial growth of single-domain graphene on hexagonal boron nitride. *Nat. Mater.* **12**, 792–797 (2013).
7. Tang, S. *et al.* Precisely aligned graphene grown on hexagonal boron nitride by catalyst free chemical vapor deposition. *Sci. Rep.* **3**, 2666 (2013).
8. Kim, E., Jain, N., Jacobs-Gedrim, R., Xu, Y. & Yu, B. Exploring carrier transport phenomena in a CVD-assembled graphene FET on hexagonal boron nitride. *Nanotechnology* **23**, 125706 (2012).
9. Kumar, V., Roy, B. & Sharma, P. Kinetics of borazine formation from ammonia borane dehydrocoupling reaction through Ab initio analysis. *Int. J. Hydrogen Energy* **44**, 22022–22031 (2019).
10. Venugopal, A., Chan, J., Li, X., Magnuson, C. W., Kirk, W. P., Colombo, L., Ruoff, R., & Vogel, E. M. Effective mobility of single-layer graphene transistors as a function of channel dimensions. *Journal of Applied Physics*, **109**(10), 104511, (2011).
